# Supplementary material for: Depth- and temperature-specific fatty acid adaptations in ctenophores from extreme habitats
Source: Oxford University Press journal article supplement (doi:10.1242/jeb.242800), 2021-10-22
Supplement: jeb242800supp.pdf [file jeb242800supp.pdf]

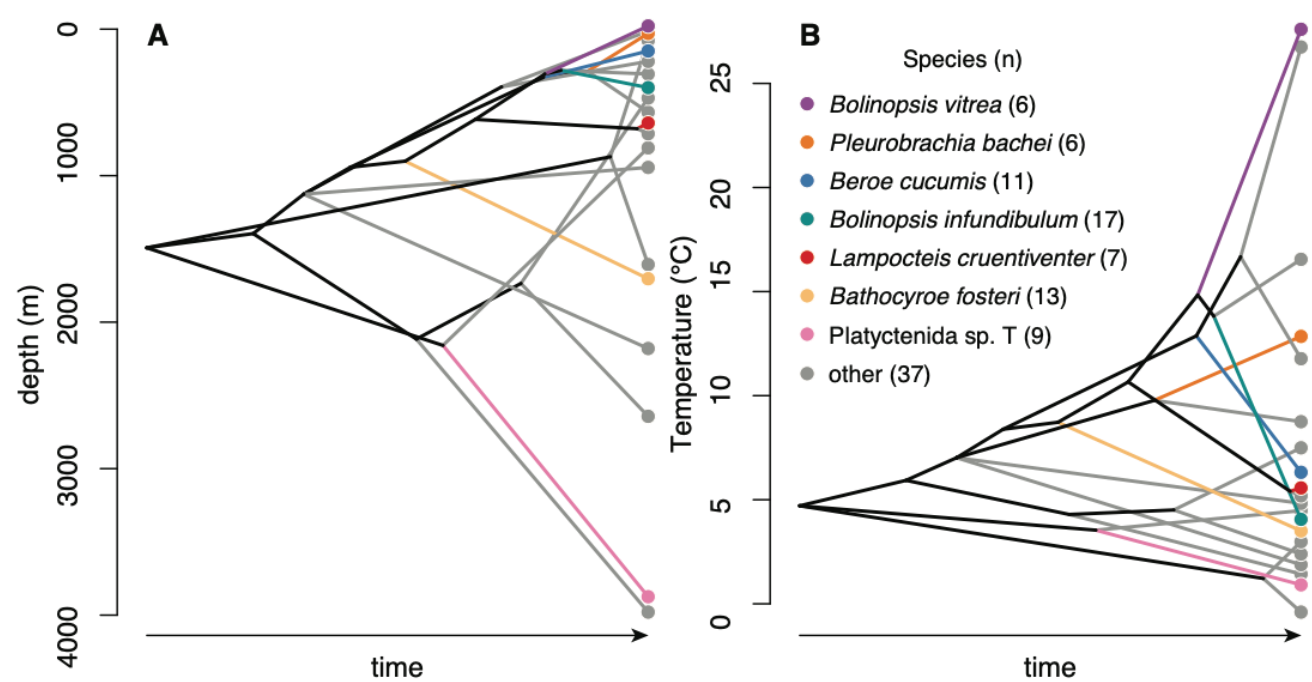

**Fig. S1. Habitat convergence and divergence are ubiquitous in ctenophore evolution** Brownian motion evolutionary reconstructions of ctenophore habitat (A) depth and (B) temperature both exhibit characteristics beneficial to phylogenetic regression. Habitat convergence is evident in the large number of intersecting lineages, while rapid divergence is indicated by recent nodes with their branches spread wide across the habitat axis. Note that this visualization does *not* imply that the last ctenophore ancestor lived circa 1500 m and 5°C; such an inference would be sensitive to rooting and taxon inclusion, and is outside the scope of this study.

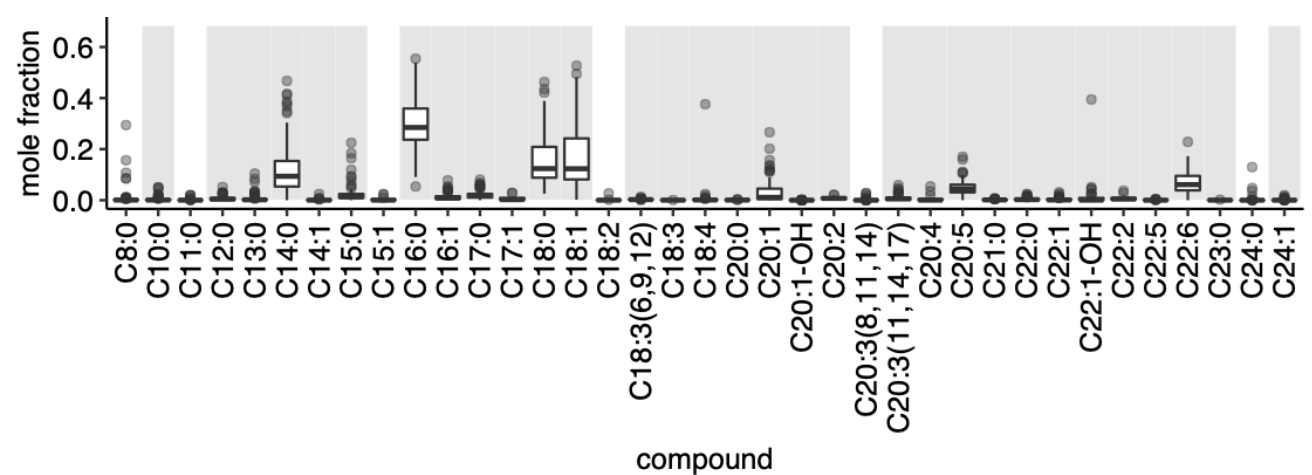

**Fig. S2. Mole fraction distributions for all thirty-seven compounds quantified** Compounds are sorted by increasing chain length and number of double bonds. Grey shaded columns denote compounds with mole fractions significantly different from zero across all 105 samples after Holm correction. Note that lack of shading does not invalidate values in that column; rather it indicates that the compound was not consistently detected in ctenophores.

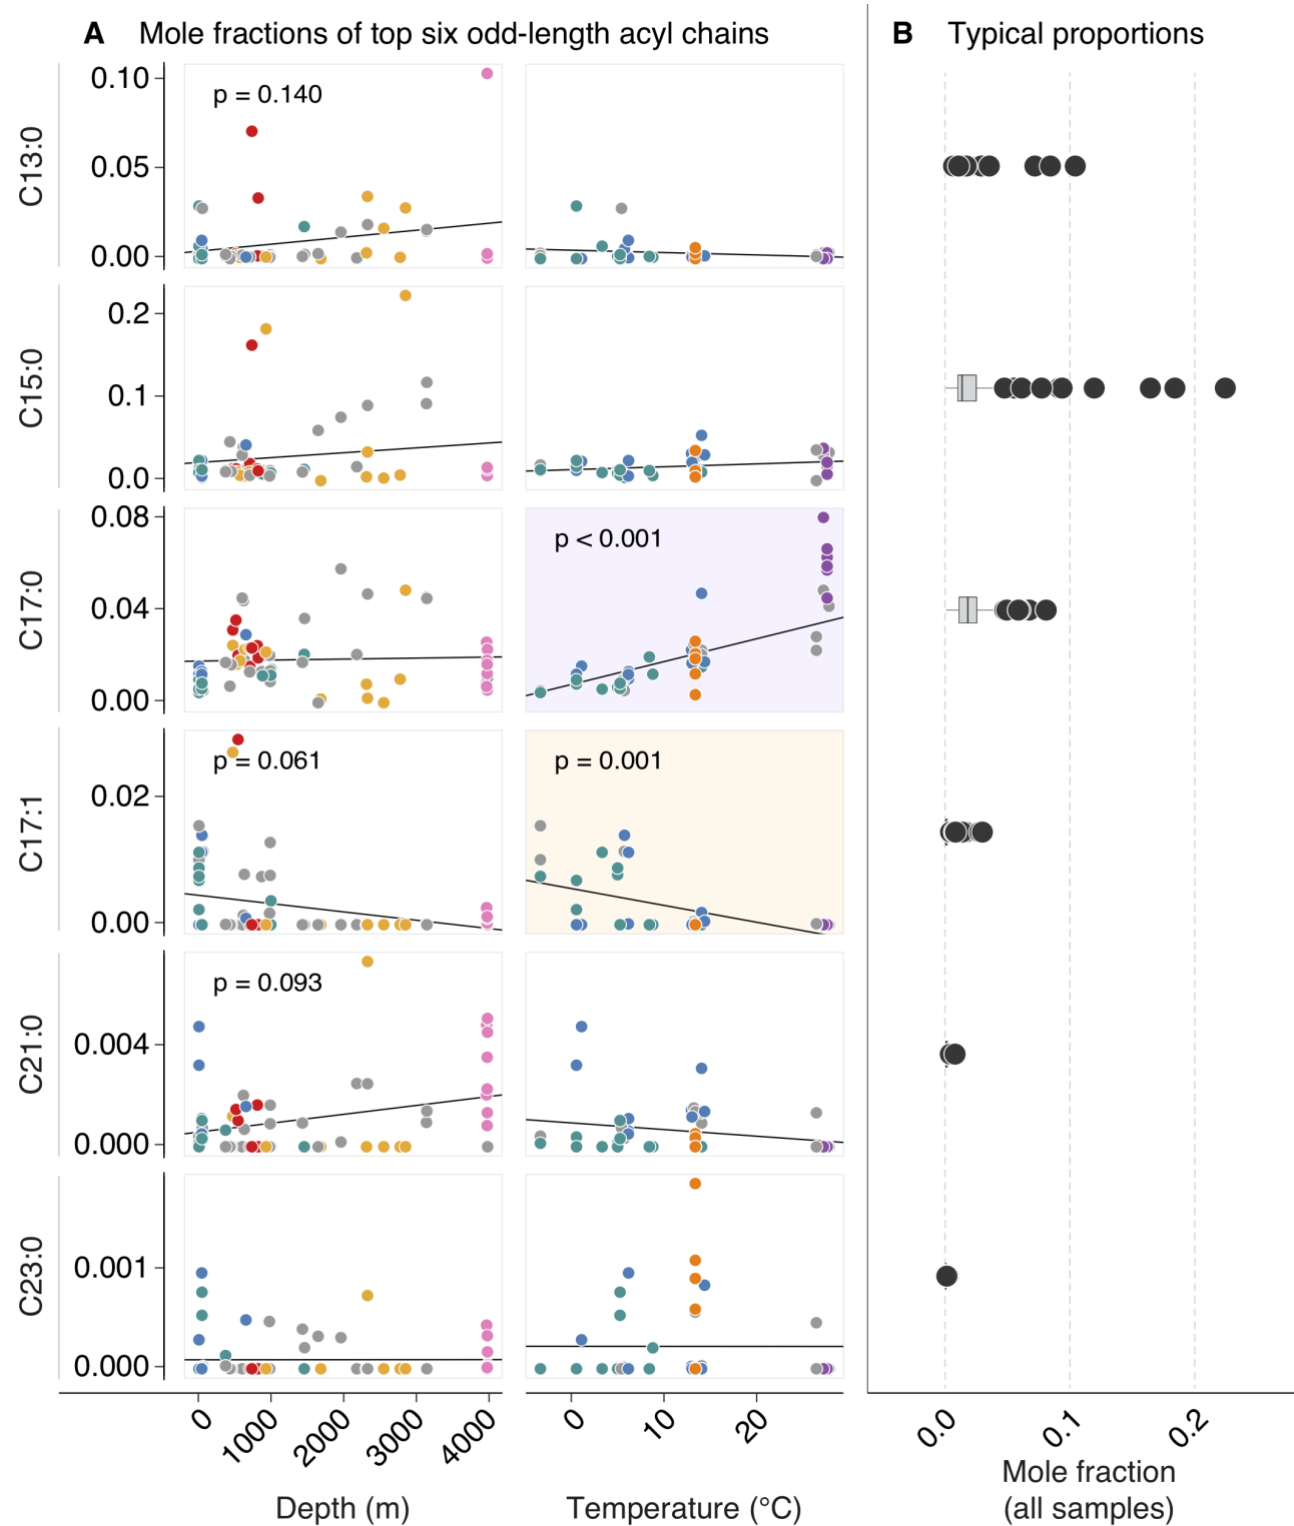

**Fig. S3. Odd-chain fatty acids are characteristics of some species and habitats**

(A) shows distributions of the relative abundances of six odd-chain fatty acid moieties that were consistently detected. (B) Phylogenetic regressions of each of these compounds against temperature and depth at the point of collection. Note the temperature trends in saturated and monounsaturated C17 fatty acids. Species are color-coded as in figures 2 and 3, with magenta- or orange-shaded plot backgrounds denoting significant positive or negative correlation.

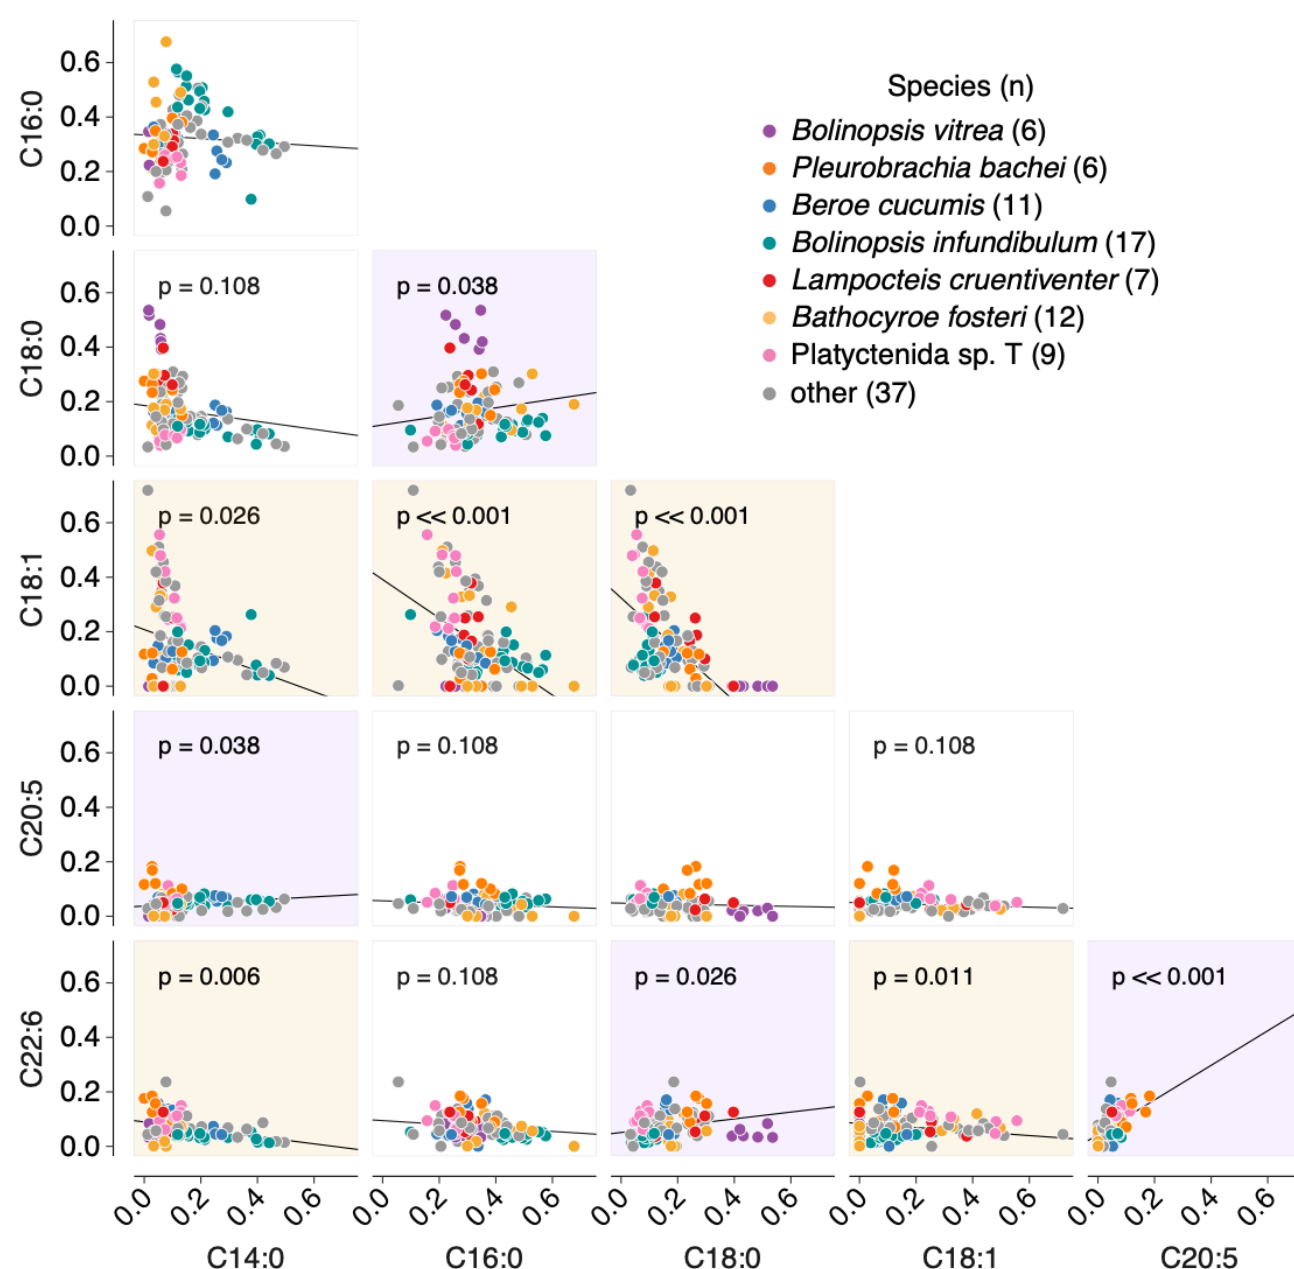

**Fig. S4. Intercorrelations of major fatty acid methyl esters suggest metabolic exchanges and functional equivalence**

Phylogenetic regressions of molar fraction of each of the predominant six fatty acid methyl esters against each of the others, for assessment of potentially relevant lipid metabolism pathways. All 105 samples are included in every regression, providing further evidence for the importance of the SFA/MUFA balance most likely mediated by ELOVL and SCD1 enzymes. The strong positive relationship between PUFAs C20:5 and C22:6 identifies them as a covarying and perhaps functionally similar unit. Species are color-coded as in figures 2 and 3, with magenta- or orange-shaded plot backgrounds denoting significant positive or negative correlation.

**Table S1. (Excel format): Species summaries of environmental parameters and fatty acid/alcohol compositions**

Each row contains data for a single species, with values stated as mean  $\pm$ SD. Species are ordered by increasing mean depth. A dash in the mean position indicates that a compound was not detected, whereas a dash in the SD position reflects n=1 and consequent lack of a variability statistic. Columns marked with an asterisk were normalized by the total of all compounds detected (even- and odd-chain fatty acids plus fatty alcohols.) All other fatty acid columns were normalized by total even-chain fatty acids, since those compounds are most integral to animal metabolism and comprise the majority fraction of all samples. The raw data and functions used to calculate these summary values are available at <http://github.com/octopode/cteno-lipids-2021>.

[Click here to download Table S1](#)

**Table S2. Collection information and assembly statistics for transcriptomes used in provisional phylogeny**

Specimens are ordered by species as in Table S1. BW\* indicates that a specimen was collected between 0 and 20 m depth using blue-water SCUBA. Corresponding temperature values are means for that depth window measured concurrently by ROV-mounted CTD.

| Species                         | Date collected | Depth (m) | Temperature (°C) | Latitude   | Longitude   | Reads     | Size (Mbp, trimmed) | Contigs | Mean length (bp) |
|---------------------------------|----------------|-----------|------------------|------------|-------------|-----------|---------------------|---------|------------------|
| <i>Pleurobrachia bachei</i>     | 4/19/2019      | BW*       | 12.01            | 36.4174° N | 122.3038° W | 53189478  | 115.02              | 106955  | 1075.39          |
| <i>Bolinopsis vitrea</i>        | 11/5/2018      | BW*       | 27.60            | 19.7745° N | 156.1139° W | 58709706  | 114.07              | 115335  | 988.99           |
| <i>Beroe ovata</i>              | 3/20/2017      | BW*       | 24.46            | 19.2613° N | 156.1495° W | 118311284 | 171.13              | 200766  | 852.39           |
| <i>Mertensia ovum</i>           | 6/1/2016       | BW*       | 5.13             | 76.0980° N | 15.9800° E  | 684500976 | 181.79              | 212890  | 853.93           |
| <i>Beroe cucumis</i>            | 3/8/2015       | 304.00    | 10.69            | 24.5010° N | 110.0023° W | 111028994 | 158.18              | 211150  | 749.12           |
| <i>Beroe forskalii</i>          | 9/30/2012      | BW*       | 12.61            | 35.9306° N | 122.9327° W | 36220776  | 71.68               | 62940   | 1138.81          |
| <i>Hormiphora californensis</i> | 6/2/2007       | 100.00    | 14.37            | 26.6660° N | 110.1480° W | 50066544  | 119.15              | 121050  | 984.29           |
| <i>Bolinopsis infundibulum</i>  | 4/24/2013      | 96.57     | 8.80             | 36.7037° N | 122.0404° W | 41132986  | 78.87               | 57907   | 1361.93          |
| <i>Cydippida</i> sp. C          | 6/11/2004      | 151.30    | 8.49             | 36.7043° N | 122.0672° W | 48472366  | 89.51               | 108667  | 823.74           |
| <i>Eurhamphaea vexilligera</i>  | 11/4/2018      | BW*       | 27.40            | 19.2963° N | 157.1638° W | 61950638  | 139.59              | 133057  | 1049.13          |
| <i>Lampocteis cruentiventer</i> | 9/30/2012      | 650.74    | 5.49             | 35.5640° N | 123.7553° W | 44174126  | 82.75               | 78239   | 1057.66          |
| <i>Aulacoctena acuminata</i>    | 11/24/2013     | 1223.84   | 3.32             | 36.6000° N | 122.1501° W | 57142936  | 67.16               | 100954  | 665.24           |
| <i>Cydippida</i> sp. X          | 7/13/2013      | 677.16    | 4.75             | 36.1147° N | 123.5481° W | 34098150  | 98.67               | 122974  | 802.40           |
| <i>Lobata</i> sp. V             | 12/3/2011      | 1755.02   | 2.23             | 36.0716° N | 122.2817° W | 44417590  | 110.65              | 135999  | 813.60           |
| <i>Bathycytena chuni</i>        | 10/1/2012      | 924.72    | 4.18             | 36.2497° N | 123.1656° W | 34496316  | 97.77               | 163110  | 599.40           |
| <i>Bathocyroe fosteri</i>       | 4/24/2013      | 589.36    | 5.64             | 36.6981° N | 122.0476° W | 45792910  | 89.31               | 85961   | 1038.98          |
| <i>Euplokamis dunlapae</i>      | 12/19/2007     | 203.87    | 8.62             | 36.7813° N | 122.0173° W | 31539004  | 55.18               | 48464   | 1138.48          |
| <i>Lampea pancerina</i>         | 7/14/2013      | 1776.67   | 2.38             | 36.3834° N | 122.6664° W | 51099402  | 126.13              | 139158  | 906.36           |
| <i>Platyctenida</i> sp. T       | 9/20/2014      | 3980.88   | 1.49             | 35.5001° N | 124.0008° W | 222387028 | 182.01              | 186439  | 976.25           |
| <i>Ctenophora</i> sp. B         | 1/23/2007      | 2966.40   | 1.64             | 35.8332° N | 122.6671° W | 36243502  | 82.85               | 85613   | 967.72           |
